# Supplementary material
Source: PubMed Central journal article supplement (PMC5998113)

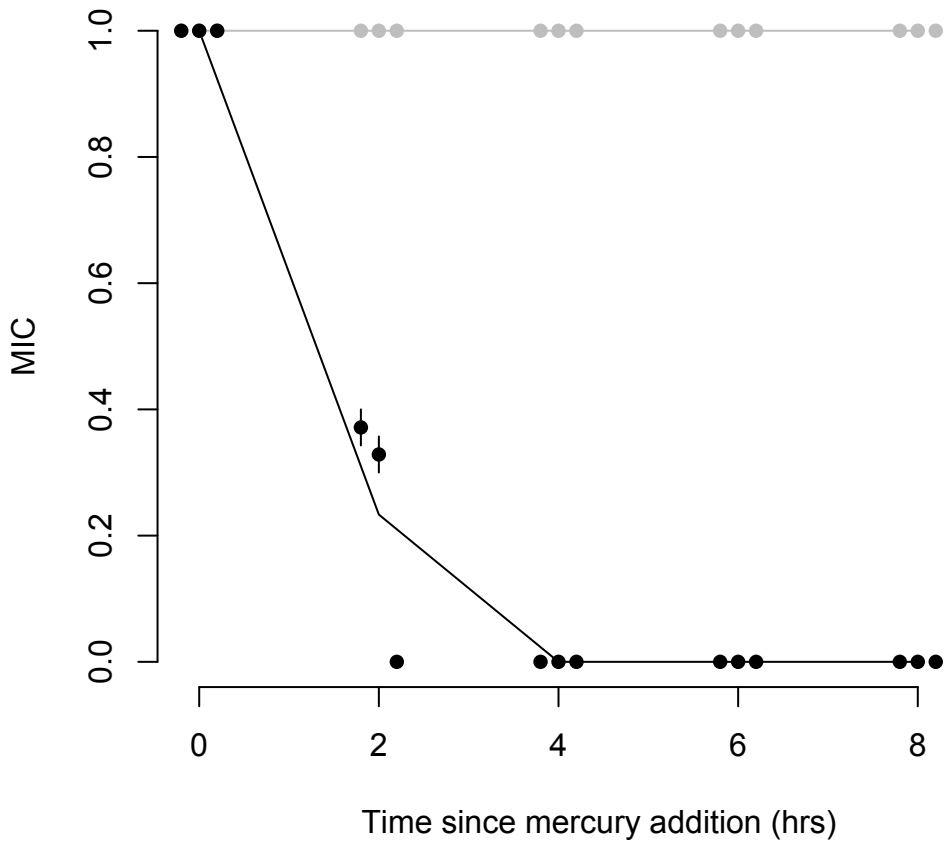

Supplement: rspb20180324supp1.pdf [file rspb20180324supp1.pdf]
